# Supplementary material for: Physiological linkage of gender, bioavailable hydroxytyrosol derivatives, and their metabolites with systemic catecholamine metabolism
Source: Royal Society of Chemistry journal article supplement (doi:10.1039/c7fo01124e), 2017-01-01
Supplement: c7fo01124e1.pdf [file c7fo01124e1.pdf]

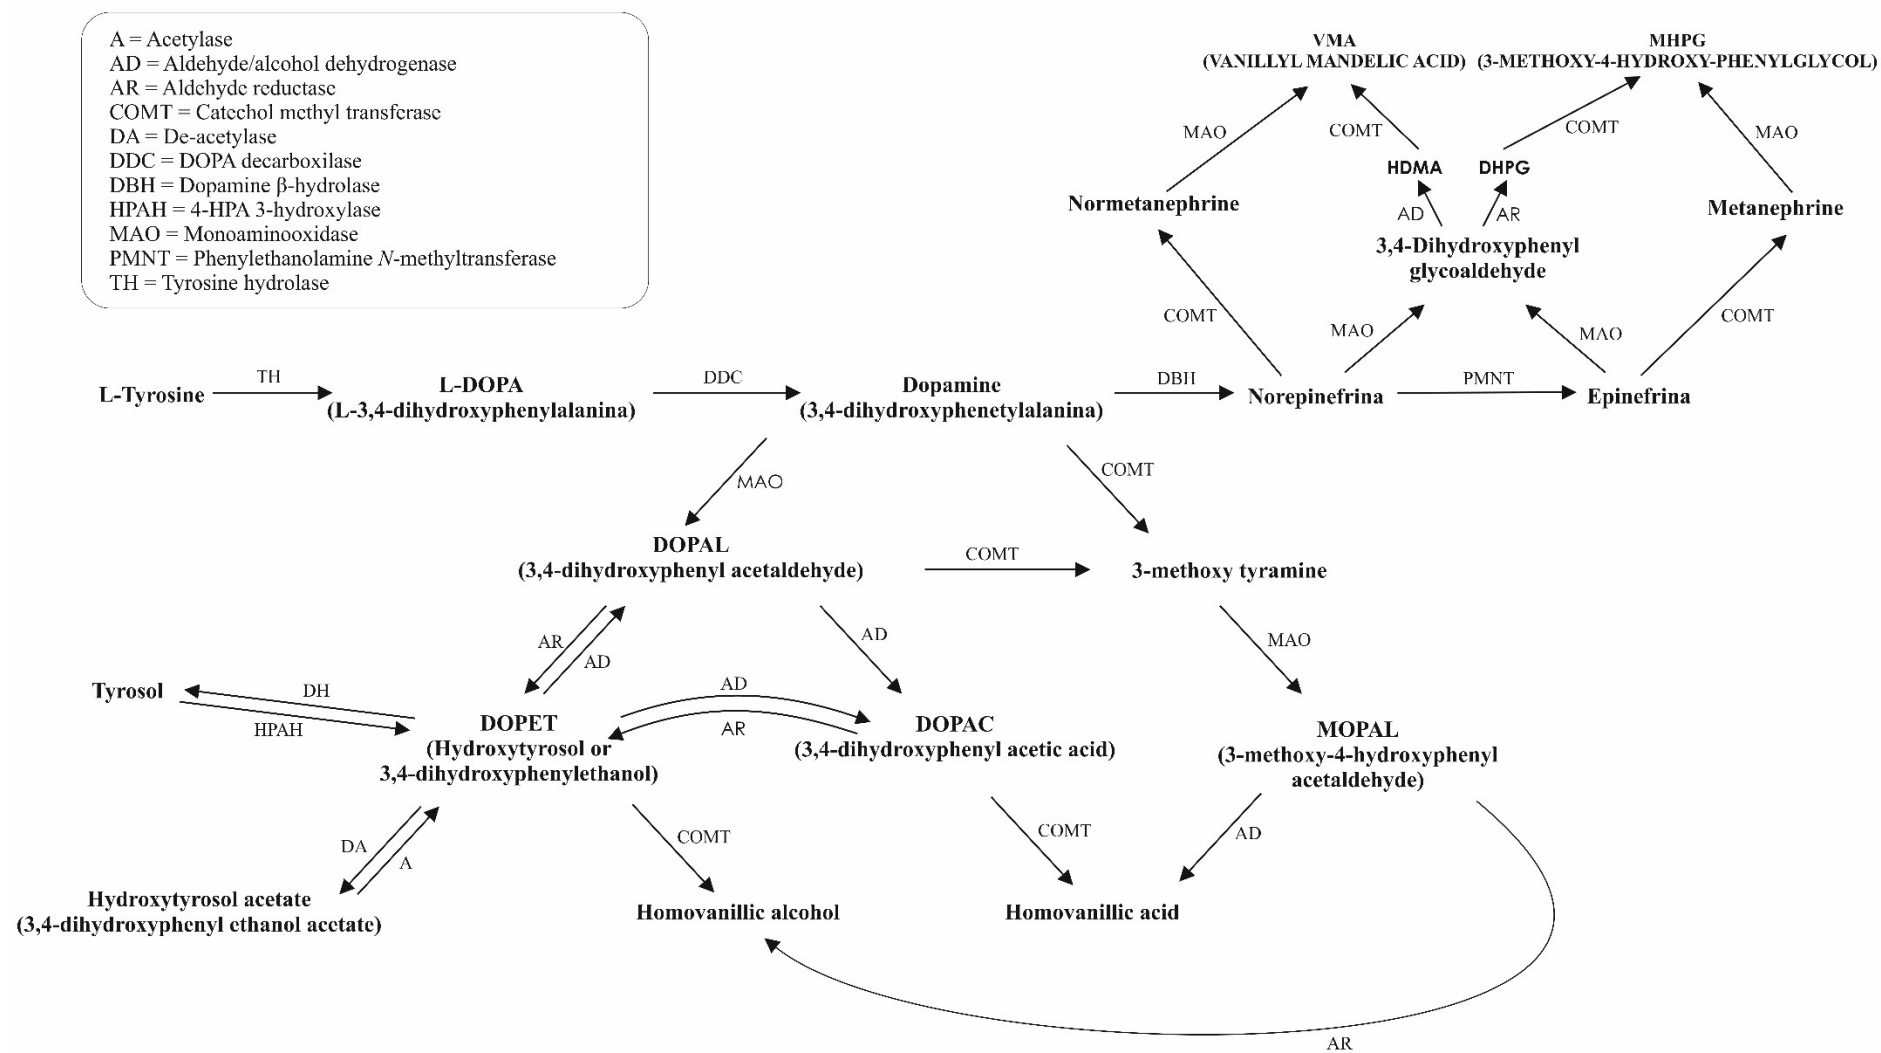

**Supplemental file 1.** Involvement of hydroxytyrosol derivatives in the synthetic pathways of catecholamines.
