# Supplementary material for: Physiological linkage of gender, bioavailable hydroxytyrosol derivatives, and their metabolites with systemic catecholamine metabolism
Source: Royal Society of Chemistry journal article supplement (doi:10.1039/c7fo01124e), 2017-01-01
Supplement: c7fo01124e2.pdf [file c7fo01124e2.pdf]

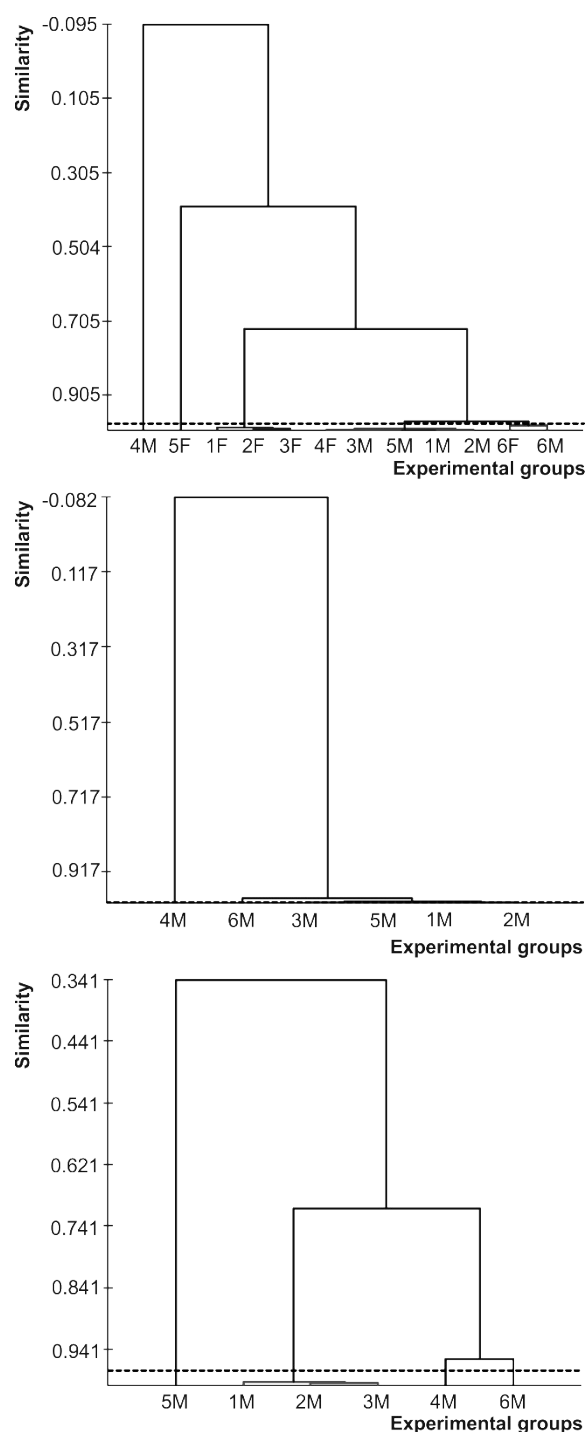

**Supplemental file 2.** Cluster dendrograms based on the urine level of HT derivatives and catecholamines in both males and females (A), males (B, and females (C) treated with 1 and 5 mg kg of hydroxytyrosol (HT), hydroxytyrosol acetate (HTA), and 2-3-dihydroxyphenylacetic acid (DOPAC). Experimental groups: 1M, males treated with 1 mg/kg HT, 2M, males treated with 5 mg/kg HT; 3M, males treated with 1 mg/kg HTA; 4M; males treated with 5 mg/kg HTA; 5M, males treated with 1 mg/kg DOPAC; 6M, males treated with 5 mg/kg DOPAC; 1F, females treated with 1 mg/kg HT; 2F, females treated with 5 mg/kg HT; 3F females treated with 1 mg/kg HTA; 4F, females treated with 5 mg/kg HTA; 5F, females treated with 1 mg/kg DOPAC; 6F, females treated with 5 mg/kg HT.
